# Supplementary material
Source: ML conference proceedings conference paper supplement (https://openreview.net/forum?id=XPZIaotutsD)
Supplement: supplementary_material [file attachment]

# README for the DeBERTa fine-tuning code

## 1. Requirements

- CUDA 10.0
- pytorch 1.3.0
- python 3.6
- bash shell 4.0
- docker
- nvidia-docker2
- 8x32G V100 GPU
- The code has been tested on Nvidia DGX-2 node with Ubuntu 18.04LTS

## 2. Setup

There are two ways to setup the running environment,

1. Unzip the code to folder DeBERTa, run **pip3 install -r requirements.txt**.  
Then you can try the bash commands under **applications/glue/** folder, e.g. mnli\_base.sh
2. Unzip the code to folder DeBERTa, enter the folder, run **./run\_docker.sh to enter docker environment, and then run commands under /DeBERTa/applications/glue/** folder

**Note:** To run the commands **you need to enter the folder of the commands first**. If you don't have 8x32G V100 GPU machine, you may need to increase the value of **--accumulative\_update 1** in the **command file from 1 to 4 or more to apply gradient accumulation to save memory**.

## 3. Experiments

The results may vary due to different random seeds, whether using FP16, GPU models and drivers. In the table we report median results with different random seeds.

| Task       | Command       | Results   | Running Time(8x32G V100 GPUs) |
|------------|---------------|-----------|-------------------------------|
| MNLI base  | mnli_base.sh  | 88.8/88.5 | 1.5h                          |
| MNLI large | mnli_large.sh | 91.2/91.0 | 2.5h                          |
| QQP large  | qqp_large.sh  | 92.3      | 6h                            |
| QNLI large | qnli_large.sh | 95.3      | 2h                            |

|             |               |      |      |
|-------------|---------------|------|------|
| MRPC large  | mrpc_large.sh | 93.4 | 0.5h |
| RTE large   | rte_large.sh  | 88.1 | 0.5h |
| SST-2 large | sst2_large.sh | 96.7 | 1h   |
| STS-b large | Stsb_large.sh | 92.5 | 0.5h |
| CoLA large  | cola_large.sh | 71.2 | 0.5h |
